# Supplementary material for: Determination of the energy landscape of Pd12Pt1 using a combined genetic algorithm and threshold energy method
Source: Royal Society of Chemistry journal article supplement (doi:10.1039/c3ra41477a), 2013-01-01
Supplement: c3ra41477a.pdf [file c3ra41477a.pdf]

### Supplementary Information

Table 1.- Representative structures characterizing the energy landscape of the PES of the  $\text{Pd}_{12}\text{Pt}_1$  cluster. The Relative Abundance (RA) of the root pairs is also presented.  $E_{\text{Bottom}}$  is the Total Energy of the structures found in the search,  $E_{\text{Top}}$  indicates the energy lid value at which the transition occurs, and  $\Delta E$  is the energy barrier value. All energies are eV/atom.

| Type   | $E_{\text{Bottom}}$ | $E_{\text{Top}}$ | $\Delta E$ | Structure                                                                            | CNA indices | RA     |
|--------|---------------------|------------------|------------|--------------------------------------------------------------------------------------|-------------|--------|
| Ih     | -3.5385             | -3.4400          | 0.0985     | 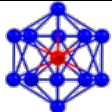   | 322         | 0.7142 |
|        |                     |                  |            |                                                                                      | 555         | 0.2857 |
| Ih-Ino | -3.4309             | -3.4000          | 0.0309     |    | 211         | 0.2500 |
|        |                     |                  |            |                                                                                      | 311         | 0.3333 |
|        |                     |                  |            |                                                                                      | 322         | 0.1666 |
|        |                     |                  |            |                                                                                      | 422         | 0.1666 |
|        |                     |                  |            |                                                                                      | 432         | 0.0833 |
| BP     | -3.4222             | -3.3700          | 0.0522     |  | 211         | 0.1428 |
|        |                     |                  |            |                                                                                      | 311         | 0.7142 |
|        |                     |                  |            |                                                                                      | 421         | 0.1428 |
| S1     | -3.4181             | -3.4000          | 0.0181     |  | 211         | 0.3157 |
|        |                     |                  |            |                                                                                      | 311         | 0.4210 |
|        |                     |                  |            |                                                                                      | 322         | 0.0526 |
|        |                     |                  |            |                                                                                      | 421         | 0.1052 |
|        |                     |                  |            |                                                                                      | 422         | 0.1052 |
| S2     | -3.3987             | -3.3500          | 0.0487     |  | 211         | 0.2222 |
|        |                     |                  |            |                                                                                      | 322         | 0.4444 |
|        |                     |                  |            |                                                                                      | 422         | 0.1111 |
|        |                     |                  |            |                                                                                      | 432         | 0.1111 |
| S3     | -3.3976             | -3.3800          | 0.0176     |  | 555         | 0.1111 |
|        |                     |                  |            |                                                                                      | 211         | 0.2666 |
|        |                     |                  |            |                                                                                      | 311         | 0.3666 |
|        |                     |                  |            |                                                                                      | 322         | 0.2000 |
| S4     | -3.3952             | -3.3600          | 0.0352     |  | 422         | 0.1333 |
|        |                     |                  |            |                                                                                      | 432         | 0.0333 |
|        |                     |                  |            |                                                                                      | 211         | 0.2631 |
|        |                     |                  |            |                                                                                      | 322         | 0.3684 |
|        |                     |                  |            |                                                                                      | 432         | 0.2368 |
|        |                     |                  |            |                                                                                      | 555         | 0.1315 |

|                    |         |         |        |                                                                                      |     |         |
|--------------------|---------|---------|--------|--------------------------------------------------------------------------------------|-----|---------|
| S5                 | -3.3803 | -3.3600 | 0.0203 |    | 211 | 0.2857  |
|                    |         |         |        |                                                                                      | 311 | 0.2380  |
|                    |         |         |        |                                                                                      | 322 | 0.2380  |
|                    |         |         |        |                                                                                      | 432 | 0.2380  |
| MT-Ih <sub>1</sub> | -3.3786 | -3.3300 | 0.0486 |    | 211 | 0.3333  |
|                    |         |         |        |                                                                                      | 322 | 0.3333  |
|                    |         |         |        |                                                                                      | 432 | 0.2500  |
|                    |         |         |        |                                                                                      | 555 | 0.0833  |
| S6                 | -3.3651 | -3.3200 | 0.0451 |    | 211 | 0.3055  |
|                    |         |         |        |                                                                                      | 322 | 0.3888  |
|                    |         |         |        |                                                                                      | 432 | 0.2222  |
|                    |         |         |        |                                                                                      | 555 | 0.0833  |
| S7                 | -3.3638 | -3.3400 | 0.0238 |    | 211 | 0.2222  |
|                    |         |         |        |                                                                                      | 311 | 0.4444  |
|                    |         |         |        |                                                                                      | 322 | 0.2222  |
|                    |         |         |        |                                                                                      | 422 | 0.1111  |
| S8                 | -3.3620 | -3.3500 | 0.0120 |    | 211 | 0.3714  |
|                    |         |         |        |                                                                                      | 322 | 0.3142  |
|                    |         |         |        |                                                                                      | 432 | 0.2571  |
|                    |         |         |        |                                                                                      | 555 | 0.0571  |
| MT-Ih <sub>2</sub> | -3.3561 | -3.3000 | 0.0561 |   | 211 | 0.2105  |
|                    |         |         |        |                                                                                      | 322 | 0.4736  |
|                    |         |         |        |                                                                                      | 432 | 0.1842  |
|                    |         |         |        |                                                                                      | 555 | 0.1315  |
| S9                 | -3.3488 | -3.3100 | 0.0388 |  | 211 | 0.1428  |
|                    |         |         |        |                                                                                      | 311 | 0.5714  |
|                    |         |         |        |                                                                                      | 322 | 0.0714  |
|                    |         |         |        |                                                                                      | 421 | 0.0714  |
| S10                | -3.3480 | -3.3000 | 0.0480 |  | 211 | 0.1818  |
|                    |         |         |        |                                                                                      | 311 | 0.7272  |
|                    |         |         |        |                                                                                      | 421 | 0.0909  |
|                    |         |         |        |                                                                                      | S11 | -3.3488 |
| 322                | 0.3714  |         |        |                                                                                      |     |         |
| 432                | 0.2285  |         |        |                                                                                      |     |         |
| 555                | 0.0571  |         |        |                                                                                      |     |         |
| MT-Ih <sub>3</sub> | -3.3421 | -3.2800 | 0.0621 |  | 211 | 0.2162  |
|                    |         |         |        |                                                                                      | 322 | 0.5135  |
|                    |         |         |        |                                                                                      | 432 | 0.1621  |
|                    |         |         |        |                                                                                      | 555 | 0.1081  |
| S12                | -3.3365 | -3.3000 | 0.0365 |  | 211 | 0.3823  |
|                    |         |         |        |                                                                                      | 322 | 0.3529  |
|                    |         |         |        |                                                                                      | 432 | 0.2352  |
|                    |         |         |        |                                                                                      | 555 | 0.0294  |

|     |         |         |        |                                                                                      |     |        |
|-----|---------|---------|--------|--------------------------------------------------------------------------------------|-----|--------|
| S13 | -3.3113 | -3.2900 | 0.0213 | 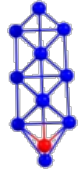   | 211 | 0.3461 |
|     |         |         |        |                                                                                      | 311 | 0.5000 |
|     |         |         |        |                                                                                      | 322 | 0.0769 |
|     |         |         |        |                                                                                      | 421 | 0.0384 |
|     |         |         |        |                                                                                      | 422 | 0.0384 |
| HL  | -3.3110 | -3.2800 | 0.0310 |    | 211 | 0.4242 |
|     |         |         |        |                                                                                      | 322 | 0.3333 |
|     |         |         |        |                                                                                      | 432 | 0.2424 |
| HR  | -3.3110 | -3.2800 | 0.0310 |    | 211 | 0.4242 |
|     |         |         |        |                                                                                      | 322 | 0.3333 |
|     |         |         |        |                                                                                      | 432 | 0.2424 |
| S14 | -3.3066 | -3.2900 | 0.0166 |    | 211 | 0.3750 |
|     |         |         |        |                                                                                      | 311 | 0.3750 |
|     |         |         |        |                                                                                      | 322 | 0.1666 |
|     |         |         |        |                                                                                      | 422 | 0.0833 |
| S15 | -3.2989 | -3.2800 | 0.0189 |    | 211 | 0.3846 |
|     |         |         |        |                                                                                      | 311 | 0.3076 |
|     |         |         |        |                                                                                      | 322 | 0.2307 |
|     |         |         |        |                                                                                      | 421 | 0.0384 |
|     |         |         |        |                                                                                      | 543 | 0.0384 |
| S16 | -3.2935 | -3.2700 | 0.0235 |   | 211 | 0.4242 |
|     |         |         |        |                                                                                      | 322 | 0.3333 |
|     |         |         |        |                                                                                      | 432 | 0.2424 |
| S17 | -3.2651 | -3.2400 | 0.0251 |  | 211 | 0.4545 |
|     |         |         |        |                                                                                      | 322 | 0.2727 |
|     |         |         |        |                                                                                      | 432 | 0.2727 |

Table 2.- Icosahedral-type structures found for Pd<sub>12</sub>Pt<sub>1</sub> clusters.

| Type             | E <sub>Bottom</sub> | E <sub>Top</sub> | ΔE     | Pd-Pd Bonds | Pt-Pd Bonds | Structure                                                                             | CNA indices | RA     |
|------------------|---------------------|------------------|--------|-------------|-------------|---------------------------------------------------------------------------------------|-------------|--------|
| Ih <sub>1</sub>  | -3.5385             | -3.4400          | 0.0985 | 30          | 12          | 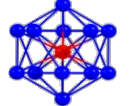   | 322         | 0.7142 |
|                  |                     |                  |        |             |             |                                                                                       | 555         | 0.2857 |
| Ih <sub>2</sub>  | -3.4677             | -3.4200          | 0.0477 | 28          | 11          |    | 211         | 0.1794 |
|                  |                     |                  |        |             |             |                                                                                       | 322         | 0.4871 |
|                  |                     |                  |        |             |             |                                                                                       | 432         | 0.1794 |
|                  |                     |                  |        |             |             |                                                                                       | 555         | 0.1538 |
| Ih <sub>3</sub>  | -3.4661             | -3.4200          | 0.0461 | 28          | 11          |    | 211         | 0.2051 |
|                  |                     |                  |        |             |             |                                                                                       | 322         | 0.4358 |
|                  |                     |                  |        |             |             |                                                                                       | 432         | 0.2051 |
|                  |                     |                  |        |             |             |                                                                                       | 555         | 0.1538 |
| Ih <sub>4</sub>  | -3.4641             | -3.4200          | 0.0441 | 28          | 11          |    | 211         | 0.2051 |
|                  |                     |                  |        |             |             |                                                                                       | 322         | 0.4358 |
|                  |                     |                  |        |             |             |                                                                                       | 432         | 0.2051 |
|                  |                     |                  |        |             |             |                                                                                       | 555         | 0.1538 |
| Ih <sub>5</sub>  | -3.4158             | -3.3800          | 0.0358 | 36          | 6           |   | 322         | 0.7142 |
|                  |                     |                  |        |             |             |                                                                                       | 555         | 0.2857 |
| Ih <sub>6</sub>  | -3.3905             | -3.3400          | 0.0505 | 32          | 7           |  | 211         | 0.1794 |
|                  |                     |                  |        |             |             |                                                                                       | 322         | 0.4871 |
|                  |                     |                  |        |             |             |                                                                                       | 432         | 0.1794 |
|                  |                     |                  |        |             |             |                                                                                       | 555         | 0.1538 |
| Ih <sub>7</sub>  | -3.3797             | -3.3300          | 0.0497 | 32          | 7           |  | 211         | 0.2051 |
|                  |                     |                  |        |             |             |                                                                                       | 322         | 0.4358 |
|                  |                     |                  |        |             |             |                                                                                       | 432         | 0.2051 |
|                  |                     |                  |        |             |             |                                                                                       | 555         | 0.1538 |
| Ih <sub>8</sub>  | -3.3712             | -3.3300          | 0.0412 | 33          | 6           |  | 211         | 0.2051 |
|                  |                     |                  |        |             |             |                                                                                       | 322         | 0.4358 |
|                  |                     |                  |        |             |             |                                                                                       | 432         | 0.2051 |
|                  |                     |                  |        |             |             |                                                                                       | 555         | 0.1538 |
| Ih <sub>9</sub>  | -3.3648             | -3.3200          | 0.0448 | 33          | 6           |  | 211         | 0.2051 |
|                  |                     |                  |        |             |             |                                                                                       | 322         | 0.4358 |
|                  |                     |                  |        |             |             |                                                                                       | 432         | 0.2051 |
|                  |                     |                  |        |             |             |                                                                                       | 555         | 0.1538 |
| Ih <sub>10</sub> | -3.3618             | -3.3200          | 0.0418 | 33          | 6           |  | 211         | 0.2051 |
|                  |                     |                  |        |             |             |                                                                                       | 322         | 0.4358 |
|                  |                     |                  |        |             |             |                                                                                       | 432         | 0.2051 |
|                  |                     |                  |        |             |             |                                                                                       | 555         | 0.1538 |

|                  |         |         |        |    |   |                                                                                     |     |        |
|------------------|---------|---------|--------|----|---|-------------------------------------------------------------------------------------|-----|--------|
| Ih <sub>11</sub> | -3.3309 | -3.3000 | 0.0309 | 36 | 3 | 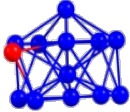 | 211 | 0.2051 |
|                  |         |         |        |    |   |                                                                                     | 322 | 0.4358 |
|                  |         |         |        |    |   |                                                                                     | 432 | 0.2051 |
|                  |         |         |        |    |   |                                                                                     | 555 | 0.1538 |
| Ih <sub>12</sub> | -3.3234 | -3.2800 | 0.0434 | 36 | 3 |  | 211 | 0.2051 |
|                  |         |         |        |    |   |                                                                                     | 322 | 0.4358 |
|                  |         |         |        |    |   |                                                                                     | 432 | 0.2051 |
|                  |         |         |        |    |   |                                                                                     | 555 | 0.1538 |

Table 3.- Helical (“Bernal spiral”) structures found for Pd<sub>12</sub>Pt<sub>1</sub> clusters. The helical shape is obtained by face-sharing tetrahedra growing in a preferential direction (anisotropic growth). Helical structures are characterized by the CNA indices 211, 322 and 432, with relative abundances 0.4242, 0.3333 and 0.2424, respectively.

| Type            | E <sub>Bottom</sub> | E <sub>Top</sub> | ΔE     | Pd-Pd Bonds | Pt-Pd Bonds | Structure                                                                             |
|-----------------|---------------------|------------------|--------|-------------|-------------|---------------------------------------------------------------------------------------|
| HR <sub>1</sub> | -3.3110             | -3.2800          | 0.0310 | 27          | 6           |    |
| HL <sub>1</sub> | -3.3110             | -3.2800          | 0.0310 | 27          | 6           |    |
| HR <sub>2</sub> | -3.3026             | -3.2700          | 0.0326 | 27          | 6           |    |
| HL <sub>2</sub> | -3.3026             | -3.2700          | 0.0326 | 27          | 6           |   |
| HR <sub>3</sub> | -3.2982             | -3.2800          | 0.0182 | 27          | 6           |  |
| HL <sub>3</sub> | -3.2982             | -3.2800          | 0.0182 | 27          | 6           |  |
| HR <sub>4</sub> | -3.2965             | -3.2700          | 0.0265 | 28          | 5           |  |
| HL <sub>4</sub> | -3.2965             | -3.2600          | 0.0365 | 28          | 5           |  |
| HR <sub>5</sub> | -3.2960             | -3.2800          | 0.0160 | 27          | 6           |  |

|                 |         |         |        |    |   |                                                                                     |
|-----------------|---------|---------|--------|----|---|-------------------------------------------------------------------------------------|
| HL <sub>5</sub> | -3.2960 | -3.2600 | 0.0360 | 27 | 6 | 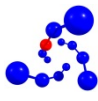 |
| HR <sub>6</sub> | -3.2801 | -3.2400 | 0.0401 | 29 | 4 |  |
| HL <sub>6</sub> | -3.2801 | -3.2300 | 0.0501 | 29 | 4 |  |
| HR <sub>7</sub> | -3.2606 | -3.2200 | 0.0406 | 30 | 3 |  |
| HL <sub>7</sub> | -3.2606 | -3.2200 | 0.0406 | 30 | 3 |  |

Table 4.- Homotops found for the biplanar topology of the Pd<sub>12</sub>Pt<sub>1</sub> cluster. Biplanar structures are characterized by the CNA indices 211, 311 and 421, with relative abundances 0.1428, 0.7142 and 0.1428, respectively. Homotop BP<sub>3</sub> is chiral, existing as the enantiomers BP<sub>3</sub>' and BP<sub>3</sub>''.

| Type               | E <sub>Bottom</sub> | E <sub>Top</sub> | ΔE     | Pd-Pd Bonds | Pt-Pd Bonds | Structure                                                                             |
|--------------------|---------------------|------------------|--------|-------------|-------------|---------------------------------------------------------------------------------------|
| BP <sub>1</sub>    | -3.4222             | -3.3700          | 0.0522 | 27          | 9           | 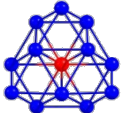   |
| BP <sub>2</sub>    | -3.3963             | -3.3600          | 0.0363 | 27          | 7           |    |
| BP <sub>3</sub> '  | -3.3661             | -3.3200          | 0.0461 | 31          | 5           |    |
| BP <sub>3</sub> '' | -3.3661             | -3.3000          | 0.0661 | 31          | 5           |  |
| BP <sub>4</sub>    | -3.3522             | -3.2800          | 0.0722 | 32          | 4           |  |
